# Supplementary material for: The genome of the yellow potato cyst nematode, Globodera rostochiensis, reveals insights into the basis of parasitism and virulence
Source: PubMed Central journal article supplement (PMC4901422; doi:10.1186/s13059-016-0985-1), 2016-06-10

**A** Correlate expression of **all** genes between stages

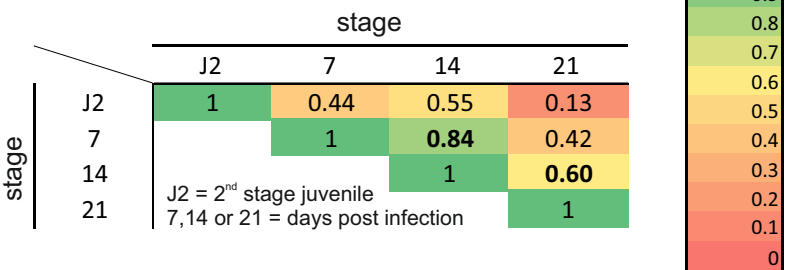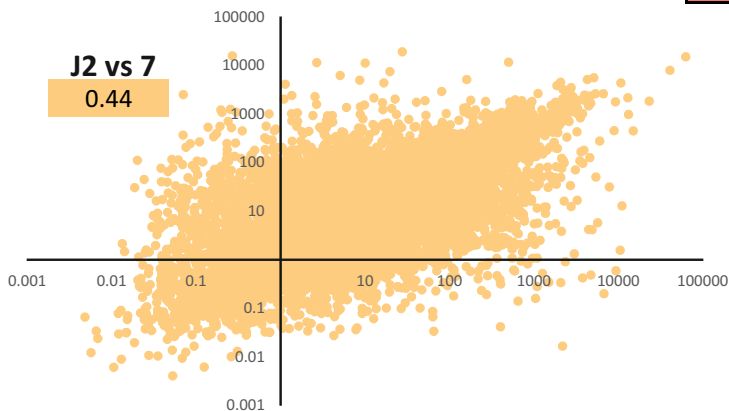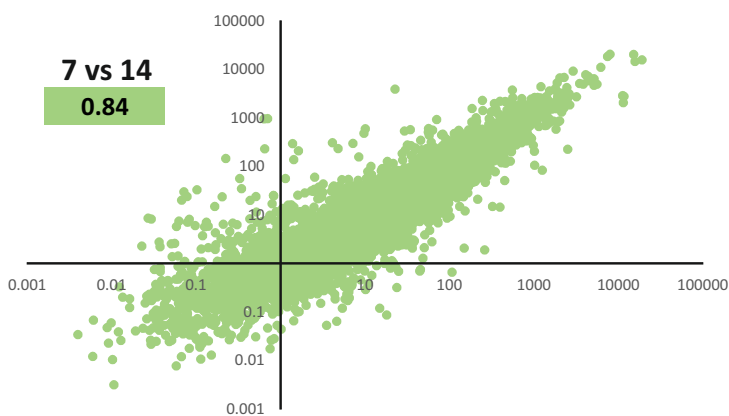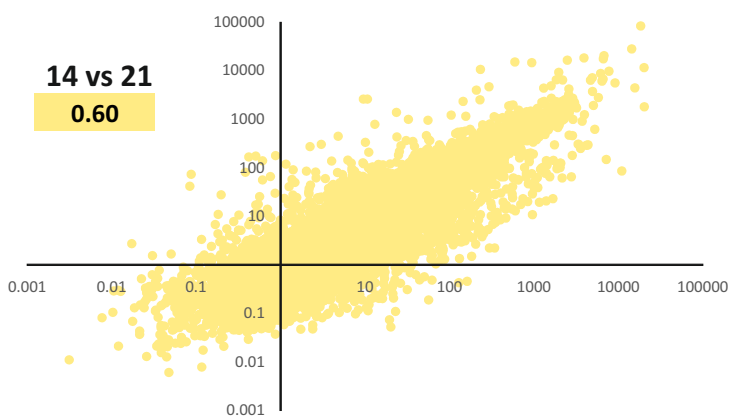

**B** Correlate expression of **effector** genes between stages

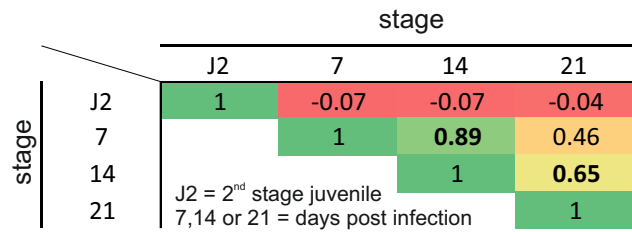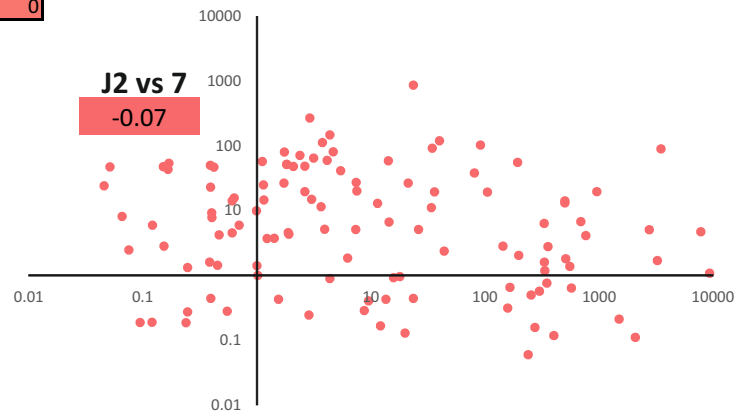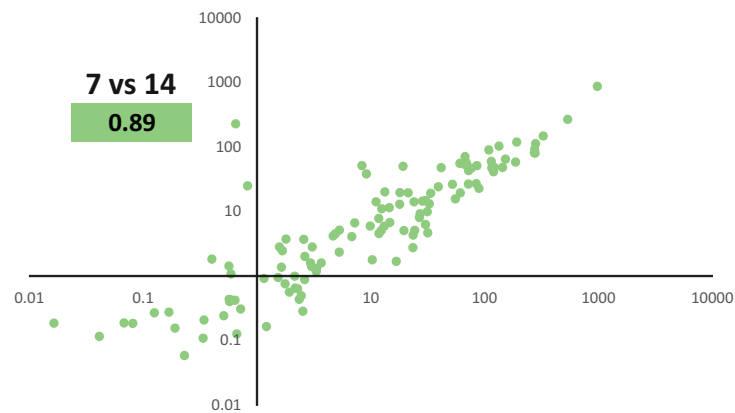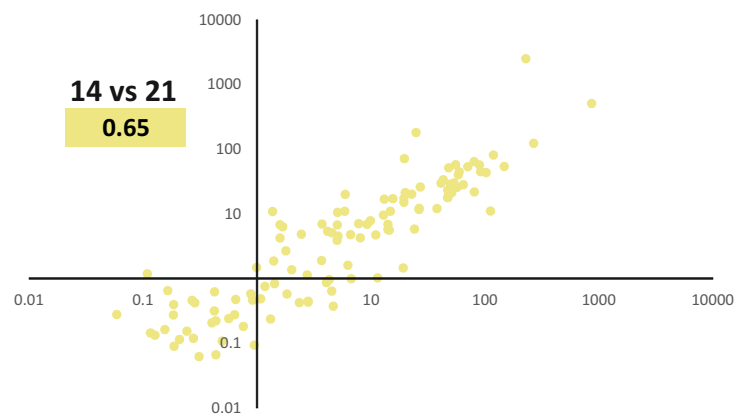

Supplement: 13059_2016_985_MOESM5_ESM.pdf [file 13059_2016_985_MOESM5_ESM.pdf]
