# Supplementary material for: The genome of the yellow potato cyst nematode, Globodera rostochiensis, reveals insights into the basis of parasitism and virulence
Source: PubMed Central journal article supplement (PMC4901422; doi:10.1186/s13059-016-0985-1), 2016-06-10

**A**Genes with 4 or more motifs 500 bp upstream *G. pallida*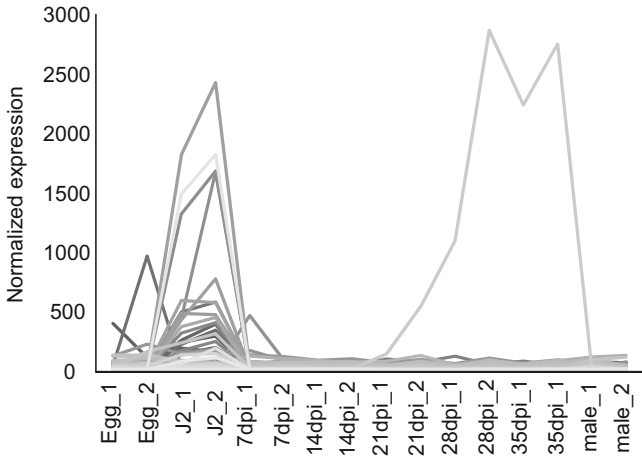**B**All genes *G. pallida* - highlighted those with 4 or more decorations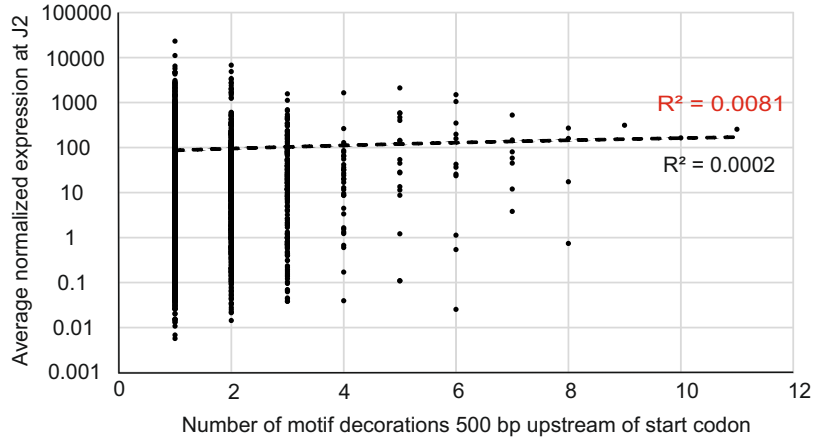

Supplement: 13059_2016_985_MOESM20_ESM.pdf [file 13059_2016_985_MOESM20_ESM.pdf]
