# Supplementary material for: The genome of the yellow potato cyst nematode, Globodera rostochiensis, reveals insights into the basis of parasitism and virulence
Source: Genome Biol. 2016 Jun 10;17:124. doi: 10.1186/s13059-016-0985-1 (PMC4901422; doi:10.1186/s13059-016-0985-1)
Supplement: Additional file 22: Table S10. — G. pallida putative DOG effectors. (XLSX 44 kb) [file 13059_2016_985_MOESM22_ESM.xlsx]

## Sheet: Pal_DOGs
														Centred log fold change
	Name	gene id	Dog boxes	Sigp	tmhmm	Cluster	Description	Egg	Egg	J2	J2	7dpi	7dpi	14dpi	14dpi	21dpi	21dpi	28dpi	28dpi	35dpi	35dpi	males	males
	Gpa_Dog_0001	GPLIN_000696800	14	1	1	50	Pre_strict	-1.03597	-0.75612	6.08866	6.73078	0.850056	0.638664	-1.49435	-1.25339	-1.64016	-1.64016	-0.85815	-0.88713	-1.41732	-1.64016	-0.2586	-1.42666
	Gpa_Dog_0002	GPLIN_000657200	12	1	1	50	Pre_strict	-0.69152	0.195609	6.41652	7.04912	-0.35936	-0.71283	-1.33507	-1.24854	-1.53066	-1.53066	-1.12201	-1.53066	-1.14767	-1.4121	-0.3379	-0.70228
	Gpa_Dog_0003	GPLIN_000228600	11	1	1	1	Pre_strict	0.619785	1.95123	3.66675	4.08463	-0.06309	-0.42429	-1.13064	-1.30644	-0.82544	-0.97968	-1.17678	-0.63501	-1.62559	-1.59597	-0.05281	-0.50666
	Gpa_Dog_0004	GPLIN_000591800	10	1	1	50	Pre_strict	-1.36651	-1.2801	6.69586	6.92888	1.0358	0.018017	-1.22704	-1.35507	-1.32462	-0.49305	-1.97533	0.508769	-1.19363	-0.979	-2.08481	-1.90817
	Gpa_Dog_0005	GPLIN_000467500	9	1	1	50	Pre_strict	-0.08759	0.362456	6.64541	7.00977	-0.33828	0.022012	-1.06688	-0.57423	-1.61457	-1.17229	-1.28077	-1.61457	-1.61457	-1.61457	-1.61457	-1.44677
	Gpa_Dog_0006	GPLIN_000507800	8	1	1	41	Pre_strict	-1.35375	-0.80819	7.14572	7.4213	-0.38184	-0.2805	-1.19591	-0.78873	-1.35375	-1.35375	-1.35375	-1.20784	-0.7264	-1.21324	-1.2564	-1.29295
	Gpa_Dog_0007	GPLIN_001206200	8	1	1	50	Pre_strict	-0.7697	-0.84098	5.84658	6.3435	-0.16465	-0.72624	-0.68777	-0.94303	-1.03167	-1.19935	-0.88906	-0.86456	-0.90915	-0.80557	-1.19935	-1.159
	Gpa_Dog_0008	GPLIN_000142200	7	1	1	41	Pre_strict	-1.59666	0.035664	8.93318	9.2258	-1.16511	-1.43929	-1.59666	-0.99294	-1.59666	-1.59666	-0.40982	-1.59666	-1.59666	-1.59666	-1.59666	-1.41424
	Gpa_Dog_0009	GPLIN_001557300	7	1	1	1	Pre_strict	-0.47968	-0.47968	2.9866	3.68088	-0.47968	-0.47968	-0.47968	-0.43166	-0.47968	-0.47968	-0.47968	-0.47968	-0.47968	-0.47968	-0.47968	-0.47968
	Gpa_Dog_0010	GPLIN_001099700	7	1	1	50	Pre_strict	-0.45444	0.286679	5.00279	5.57122	-0.52946	-0.38469	-0.84043	-0.61445	-1.02976	-1.14322	-1.67519	-1.32286	-0.31841	-1.10259	-0.54983	-0.89536
	Gpa_Dog_0011	GPLIN_000241400	6	1	1	50	Pre_strict	-1.2039	-0.48396	4.39773	6.28979	-0.39484	-0.65323	-0.71131	-0.90192	0.325001	-0.49691	-0.65903	-1.2039	-0.69182	-1.2039	-1.2039	-1.2039
	Gpa_Dog_0012	GPLIN_000422800	6	1	1	50	Pre_strict	0.723512	-0.32654	5.91625	6.14194	-0.88677	-0.4874	-1.27492	-0.71353	-1.27492	-1.27492	-1.27492	-1.27492	-0.93879	-1.27492	-0.50419	-1.27492
	Gpa_Dog_0013	GPLIN_000638100	5	1	1	41	Pre_strict	-1.08391	0.155844	8.34468	8.76207	-0.34213	-0.08552	-0.87522	-1.1955	-2.47644	-2.3482	-1.51713	-1.9498	-1.30477	-1.706	-0.55288	-1.8251
	Gpa_Dog_0014	GPLIN_000200500	5	1	1	1	Pre_strict	1.5178	0.514117	2.74298	1.8272	-0.11136	-0.1758	-0.81607	-0.81447	-1.03132	0.056256	-1.03132	-1.03132	-1.03132	0.550422	-0.66229	-0.5035
	Gpa_Dog_0015	GPLIN_001178300	5	1	1	1	Pre_strict	-0.33957	-0.3499	3.26349	3.35801	0.223207	-0.27818	-0.51113	-0.69022	-0.83373	-0.83373	-0.83373	-0.83373	-0.4976	0.559142	-0.56859	-0.83373
	Gpa_Dog_0016	GPLIN_000788900	5	1	1	1	Pre_strict	-0.1225	-0.50808	3.48985	3.67926	0.035326	-0.17439	-0.57469	-0.68415	-0.80134	-0.46296	-0.80134	-0.72793	-0.56486	-0.36707	-0.70578	-0.70934
	Gpa_Dog_0017	GPLIN_001008400	5	1	1	105	Pre_strict	-1.80883	-1.13346	6.89534	7.77023	0.559385	1.00794	-0.38146	-1.03578	-1.80883	-1.80883	-1.80883	-1.80883	0.172412	-1.39499	-1.80883	-1.60664
	Gpa_Dog_0018	GPLIN_000437400	5	1	1	50	Pre_strict	1.40508	1.63329	6.91324	6.86889	-0.54623	-0.576	-1.5269	-1.59861	-2.03269	-1.82471	-1.83727	-2.27258	-1.86437	-1.26294	0.193837	-1.67203
	Gpa_Dog_0019	GPLIN_001138500	5	1	1	50	Pre_strict	-0.96611	-0.96611	5.1761	5.69808	-0.96611	-0.79715	-0.29537	-0.87899	-0.96611	-0.96611	-0.96611	-0.96611	-0.96611	0.562665	-0.96611	-0.77038
	Gpa_Dog_0020	GPLIN_000195600	5	1	1	50	Pre_strict	-0.51427	0.577235	5.10945	5.40817	0.197596	0.021789	-0.09102	0.122844	-1.46058	-1.33417	-1.91099	-0.61465	-1.32909	-0.70544	-1.73806	-1.73882
	Gpa_Dog_0021	GPLIN_000290400	4	1	1	70	Pre_strict	-1.06993	-0.96872	0.412399	1.02604	3.21465	1.7771	-0.9268	0.747593	-0.37636	-1.08634	-0.94202	1.56699	-1.46928	0.959748	-1.46928	-1.39579
	Gpa_Dog_0022	GPLIN_000744000	4	1	1	39	Pre_strict	-2.84255	-2.15258	3.21919	4.01442	2.67428	2.37563	1.02462	1.37205	0.570195	-0.43033	-0.67854	-0.87826	-0.99232	-0.71064	-4.08746	-2.47771
	Gpa_Dog_0023	GPLIN_000224900	4	1	1	50	Pre_strict	-0.94255	-0.61765	4.14814	4.63849	-0.27617	-0.07996	-0.94255	-0.73624	-0.94255	-0.94255	-0.94255	1.40636	-0.94255	-0.94255	-0.94255	-0.94255
	Gpa_Dog_0024	GPLIN_001009200	4	1	1	50	Pre_strict	-1.38224	-0.12739	5.73574	5.7577	0.156943	-0.10596	-0.92179	-0.89425	-1.14439	-1.00982	-1.63099	-0.14222	-0.84425	-1.24537	-0.86796	-1.33377
	Gpa_Dog_0025	GPLIN_001519000	4	1	1	50	Pre_strict	-1.02492	-0.07025	5.44948	5.82039	-1.02492	-0.69905	-0.54638	-0.77342	-1.02492	-1.02492	-1.02492	-1.02492	-0.33094	-1.02492	-1.02492	-0.65043
	Gpa_Dog_0026	GPLIN_000962200	3	1	1	105	Pre_strict	-1.73108	-0.47265	5.53859	5.73298	2.51331	1.87276	0.195777	0.07028	-1.42868	-1.29856	-2.3999	-1.41888	-2.16474	-1.67053	-1.24193	-2.09675
	Gpa_Dog_0027	GPLIN_000861900	3	1	1	39	Pre_strict	-1.51006	-1.25885	5.71498	5.69301	1.6962	1.46284	0.901712	0.399047	-0.52324	-0.04101	-4.42668	0.322546	-1.90732	-0.49853	-2.64995	-3.37468
	Gpa_Dog_0028	GPLIN_001444200	3	1	1	19	Pre_strict	-0.98293	-0.98293	2.1072	3.9873	0.496715	0.819359	0.129155	-0.25799	-0.2407	-0.98293	-0.98293	0.822372	-0.98293	-0.98293	-0.98293	-0.98293
	Gpa_Dog_0029	GPLIN_000207700	3	1	1	1	Pre_strict	-0.79148	-0.46281	3.53901	4.52279	-0.79148	0.033739	0.060161	-0.20928	-0.79148	-0.79148	-0.79148	-0.79148	-0.79148	-0.79148	-0.53528	-0.6165
	Gpa_Dog_0030	GPLIN_000821100	3	1	1	1	Pre_strict	-0.54286	-0.54286	3.88003	3.63119	-0.54286	-0.54286	-0.54286	-0.45406	-0.54286	-0.54286	-0.54286	-0.54286	-0.54286	-0.54286	-0.54286	-0.54286
	Gpa_Dog_0031	GPLIN_000142600	3	1	1	28	Pre_strict	3.06889	-0.15726	7.06889	7.6043	-1.75401	-1.70639	-1.75401	-1.55074	-1.75401	-1.75401	-1.75401	-1.75401	-1.75401	-1.75401	0.141523	-0.43712
	Gpa_Dog_0032	GPLIN_000258900	3	1	1	1	Pre_strict	-0.65722	-0.19912	3.79277	4.16724	-0.26738	-0.50013	-0.65722	-0.57638	-0.65722	-0.65722	-0.50201	-0.65722	-0.65722	-0.65722	-0.65722	-0.65722
	Gpa_Dog_0033	GPLIN_000776700	3	1	1	105	Pre_strict	-0.90872	-0.52896	6.39134	6.74124	1.23008	0.894828	-0.78027	-1.12642	-1.13676	-0.14141	-0.71076	-1.86146	-2.20671	-1.12108	-2.42435	-2.31058
	Gpa_Dog_0034	GPLIN_001236200	3	1	1	1	Pre_strict	-0.93434	0.106981	3.05934	4.90581	0.331945	-0.24032	-0.57235	-0.27735	-0.93434	-0.40511	-0.93434	-0.93434	-0.93434	-0.93434	-0.70511	-0.5978
	Gpa_Dog_0035	GPLIN_000064200	3	1	1	19	Pre_strict	-0.95825	0.164657	2.42252	2.83602	0.847104	0.835145	-0.10589	0.373001	-0.83983	0.261759	-0.478	-1.07165	-1.07165	-1.07165	-1.07165	-1.07165
	Gpa_Dog_0036	GPLIN_001395000	3	1	1	1	Pre_strict	-0.43494	-0.04947	3.17561	3.41471	-0.19668	-0.20492	-0.35337	-0.01814	-0.61895	-0.40842	-0.8623	-0.8623	-0.44854	-0.73326	-0.8623	-0.53675
	Gpa_Dog_0037	GPLIN_000207800	3	1	1	50	Pre_strict	-1.6117	-1.6117	5.07879	5.53035	0.152198	-0.24461	-0.12582	-0.21551	-0.61076	-0.60636	-0.63006	-0.39369	-0.86427	-1.14449	-1.09067	-1.6117
	Gpa_Dog_0038	GPLIN_000968600	3	1	1	50	Pre_strict	-0.73662	-0.73662	3.69783	4.95007	-0.58822	-0.4345	-0.61502	-0.44539	-0.59667	-0.10751	-0.73662	-0.73662	-0.73662	-0.73662	-0.73662	-0.70423
	Gpa_Dog_0039	GPLIN_000228700	3	1	1	50	Pre_strict	-1.00165	-0.76788	5.15371	5.49311	-0.73329	-0.1877	-0.71329	-0.79763	-1.00165	-1.00165	-1.00165	-1.00165	-1.00165	-1.00165	-0.04916	-0.38632
	Gpa_Dog_0040	GPLIN_000886600	3	1	1	50	Pre_strict	-1.8515	-1.86251	5.49241	5.38811	0.397164	0.553967	-0.26533	-0.28459	-0.66802	-0.03701	0.157039	-2.0028	-0.54324	-0.45328	-2.04548	-1.97493
	Gpa_Dog_0041	GPLIN_000027900	2	1	1	63	Pre_strict	-1.58515	-2.13913	6.18023	6.63932	2.32633	1.43427	-1.01527	-1.02747	-1.78735	-1.09627	-1.94928	0.672954	-1.85547	-0.98658	-1.38612	-2.42501
	Gpa_Dog_0042	GPLIN_000333100	2	1	1	14	Pre_strict	3.63916	0.887685	9.36298	9.74488	-2.43585	-2.46107	-2.22895	-2.57779	-2.84582	-2.84582	-2.16629	-1.74414	-1.58484	-2.14142	-0.32848	-0.27424
	Gpa_Dog_0043	GPLIN_000628100	2	1	1	1	Pre_strict	-0.68739	-0.68739	2.64654	3.55875	0.046982	0.004332	-0.06567	-0.2998	0.012167	-0.68739	-0.68739	-0.68739	-0.68739	-0.68739	-0.40422	-0.68739
	Gpa_Dog_0044	GPLIN_000195900	2	1	1	105	Pre_strict	-1.14709	-0.41603	6.25128	6.27738	1.08597	1.22145	0.259836	-0.45417	-2.03265	-0.2572	-2.03265	-2.03265	-1.17152	-1.48668	-2.03265	-2.03265
	Gpa_Dog_0045	GPLIN_000201400	2	1	1	105	Pre_strict	-0.20299	0.423866	5.40202	5.84922	2.15255	1.25852	-1.47304	-0.53303	-1.77107	-1.73088	-2.83869	-1.21868	-1.65367	-1.60268	-1.22156	-0.83988
	Gpa_Dog_0046	GPLIN_000779100	2	1	1	1	Pre_strict	-0.14876	-0.67893	3.91548	3.97483	0.133087	-0.34883	-0.2867	-0.67867	-0.93916	-0.93916	-0.82266	-0.87459	-0.63548	-0.50407	-0.40271	-0.76368
	Gpa_Dog_0047	GPLIN_000361100	2	1	1	14	Pre_strict	3.1992	0.736273	9.58825	9.8179	-1.92563	-1.94459	-1.65666	-1.85745	-2.50072	-2.11239	-2.50072	-2.50072	-2.50072	-0.97662	-1.03585	-1.82956
	Gpa_Dog_0048	GPLIN_001444100	2	1	1	1	Pre_strict	-0.86646	-0.86646	4.35405	4.61747	0.433069	-0.08619	-0.02581	-0.62802	-0.86646	-0.86646	-0.86646	-0.86646	-0.86646	-0.86646	-0.86646	-0.86646
	Gpa_Dog_0049	GPLIN_001146800	2	1	1	39	Pre_strict	-1.50502	-1.43784	4.08967	4.6457	0.696827	0.533222	-0.25472	-0.11346	-1.00251	-0.01106	-1.12185	-0.09594	-1.50502	-0.19157	-1.22144	-1.50502
	Gpa_Dog_0050	GPLIN_000892900	2	1	1	105	Pre_strict	0.152771	-1.63945	6.53782	6.88774	1.40777	1.09248	0.448467	-0.00361	-1.66132	-1.78726	-1.35322	-2.7123	-1.2817	-1.96181	-1.56778	-2.55862
	Gpa_Dog_0051	GPLIN_000280200	2	1	1	1	Pre_strict	-0.88948	1.02195	4.01816	3.70198	0.083536	-0.44901	-0.88948	-0.65207	-0.88948	-0.88948	-0.22267	-0.88948	-0.88948	-0.88948	-0.88948	-0.38606
	Gpa_Dog_0052	GPLIN_000638300	2	1	1	161	Pre_strict	2.41476	5.25909	4.31267	10.157	-2.25965	-1.76538	-2.25965	-2.07509	-2.25965	-2.25965	-2.25965	-1.75391	-2.25965	-2.25965	0.816868	-1.54846
	Gpa_Dog_0053	GPLIN_000167000	2	1	1	70	Pre_strict	-1.37718	-1.30752	1.51154	2.05389	2.44655	1.65613	0.377131	0.929388	-0.90042	1.19142	-1.45427	-1.45427	-0.94531	0.143056	-1.45427	-1.41586
	Gpa_Dog_0054	GPLIN_000938200	2	1	1	1	Pre_strict	-0.98479	2.06552	2.31279	3.49208	0.185998	1.23882	-0.65551	0.176711	-0.55686	-1.50994	-1.50994	-1.50994	-0.32785	-1.50994	-0.20906	-0.69809
	Gpa_Dog_0055	GPLIN_000107900	2	1	1	105	Pre_strict	-1.43865	-1.64987	5.98193	6.30287	1.46108	0.770015	0.518741	0.496717	-1.18746	-0.32323	-2.14411	-1.9318	-1.74845	-0.87684	-1.83662	-2.39432
	Gpa_Dog_0056	GPLIN_000426100	2	1	1	41	Pre_strict	-1.26888	0.165561	8.50018	8.46205	-0.72386	-0.85926	-0.90477	-1.0086	-1.68448	-1.68448	-1.25539	-1.68448	-1.28215	-1.68448	-1.51627	-1.5707
	Gpa_Dog_0057	GPLIN_000925000	2	1	1	1	Pre_strict	-1.01494	-1.01494	2.73222	3.01097	-0.22998	0.036359	-0.83808	-0.43723	-0.47569	0.99939	-1.01494	-1.01494	-1.01494	-1.01494	0.258616	1.0331
	Gpa_Dog_0058	GPLIN_000599600	2	1	1	39	Pre_strict	-0.80498	-0.71122	3.80045	5.12615	1.50152	0.945622	-0.05645	0.274039	-1.33254	-1.12114	-1.03502	-1.33254	-1.33254	-1.33254	-1.33254	-1.25631
	Gpa_Dog_0059	GPLIN_000068000	2	1	1	105	Pre_strict	-0.9658	-1.20657	6.09473	6.2788	0.643142	0.647944	0.286089	0.134784	-2.42708	-1.78817	-1.41935	-1.35653	-1.21673	-2.02954	-0.0525	-1.62323
	Gpa_Dog_0060	GPLIN_000899300	2	1	1	1	Pre_strict	1.32725	-0.15206	2.3606	2.4135	0.221306	-0.15903	-0.55423	-1.29074	-0.44344	-0.54908	-0.46544	-0.40088	-0.62301	-1.0404	0.713011	-1.35735
	Gpa_Dog_0061	GPLIN_001296800	2	1	1	1	Pre_strict	-0.18368	-0.84795	4.15832	4.72282	0.363032	-0.2019	-0.49485	-0.71581	-0.77266	-0.91738	-0.51844	-0.83733	-0.71712	-0.95754	-1.17712	-0.9024
	Gpa_Dog_0062	GPLIN_000196000	2	1	1	39	Pre_strict	-1.37101	-0.14453	3.80126	4.78931	1.24717	0.602103	0.350283	-0.3299	-0.18972	1.03756	-2.48984	-0.48095	-2.08655	-1.19489	-1.40847	-2.13182
	Gpa_Dog_0063	GPLIN_001153200	2	1	1	39	Pre_strict	-2.27819	-2.28975	4.36451	4.54968	2.27847	1.8257	0.518055	0.462611	-0.36151	0.092053	-1.90015	-0.78115	-1.07473	-0.26439	-2.78789	-2.35331
	Gpa_Dog_0064	GPLIN_000975600	2	1	1	41	Pre_strict	-1.16512	-0.14832	7.52324	6.84669	-0.78954	-1.16512	-1.16512	-1.08755	-1.16512	-1.16512	-1.16512	-1.16512	-1.16512	-1.16512	-1.16512	-0.69332
	Gpa_Dog_0065	GPLIN_000966000	2	1	1	1	Pre_strict	-0.84593	0.192176	2.53694	3.17076	0.719209	0.088588	0.100875	-0.23712	-0.54698	-0.84593	-0.84593	-0.67988	-0.34387	-0.84593	-0.84593	-0.77103
	Gpa_Dog_0066	GPLIN_001030700	2	1	1	39	Pre_strict	-1.40178	-0.66866	4.49718	4.92011	1.18381	0.587887	-0.52761	0.209746	-0.95624	0.566209	-1.40178	-1.40178	-1.40178	-1.40178	-1.40178	-1.40178
	Gpa_Dog_0067	GPLIN_000319000	2	1	1	39	Pre_strict	-1.60989	-0.89671	2.96605	3.53758	2.41781	1.20739	0.021754	-0.18278	-1.12823	-0.13592	-1.14029	-0.34945	-1.17234	-0.6881	-1.41913	-1.42776
	Gpa_Dog_0068	GPLIN_001219800	2	1	1	41	Pre_strict	-1.30308	0.588202	7.85509	8.61876	1.09796	0.335183	-2.96915	-1.36578	0.383333	-3.37943	0.347397	-2.6963	1.47341	-2.71757	-3.37943	-2.88859
	Gpa_Dog_0069	GPLIN_000617700	2	1	1	19	Pre_strict	-0.38104	-0.51159	2.68058	2.65225	-0.64367	-0.12213	0.523061	-0.33464	1.60645	0.190721	-0.91407	-2.19723	-0.72163	-1.12168	-0.51902	-0.18636
	Gpa_Dog_0070	GPLIN_001415400	2	1	1	70	Pre_strict	-2.03058	-1.50012	3.7313	4.6887	3.05916	2.16741	-0.10657	1.27088	-1.05151	-1.30687	-1.07051	-2.03058	-2.03058	-1.03841	-1.02155	-1.73016
	Gpa_Dog_0071	GPLIN_000523200	2	1	1	50	Pre_strict	-0.60719	-0.60719	1.84132	4.90814	0.014566	-0.60719	-0.60719	-0.22842	-0.01595	-0.60719	-0.60719	-0.60719	-0.60719	-0.60719	-0.60719	-0.4478
	Gpa_Dog_0072	GPLIN_000953700	2	1	1	50	Pre_strict	-0.34563	-0.32803	4.09673	5.58163	1.25762	0.011853	-1.03347	-1.1454	-0.78082	-1.34782	-1.35924	-0.8012	-1.55505	-0.4028	-0.42951	-1.41886
	Gpa_Dog_0073	GPLIN_001292400	2	1	1	50	Pre_strict	-0.44621	0.73202	4.56891	4.67545	1.31369	0.522143	-0.41182	-0.31538	-1.19075	-1.09486	-1.48144	-1.73198	-1.59147	-0.96171	-1.01362	-1.57298
	Gpa_Dog_0074	GPLIN_001056700	2	1	1	50	Pre_strict	-1.0417	1.07572	4.28145	7.86719	-1.0417	-0.88298	-1.0417	-0.88268	-1.0417	-1.0417	-1.0417	-1.0417	-1.0417	-1.0417	-1.0417	-1.0417
	Gpa_Dog_0075	GPLIN_001550200	2	1	1	50	Pre_strict	-0.79362	-0.79362	4.97517	4.98916	-0.79362	-0.79362	-0.79362	-0.67113	0.230236	-0.79362	-0.79362	-0.79362	-0.79362	-0.79362	-0.79362	-0.79362
	Gpa_Dog_0076	GPLIN_000864300	2	1	1	50	Pre_strict	-0.70732	-0.45852	4.70504	5.10383	0.318612	-0.8292	-0.9203	-0.68318	-1.02558	-1.02558	-1.02558	-0.26268	-0.71781	-1.02558	-0.57593	-0.87023
	Gpa_Dog_0077	GPLIN_001258100	2	1	1	50	Pre_strict	-0.92784	-1.21956	5.98667	6.54647	0.295117	-0.33979	-1.23814	-0.75486	-1.22391	-1.35789	-1.69296	-0.67737	-1.5604	-1.14707	-0.05301	-0.63547
	Gpa_Dog_0078	GPLIN_000780600	2	1	1	50	Pre_strict	0.039492	2.18503	4.57865	4.92006	1.14194	0.494531	-0.46806	-0.32319	0.561682	-1.19517	-0.41303	-1.5342	-0.45527	-1.94371	-3.66161	-3.92715
	Gpa_Dog_0079	GPLIN_000604400	2	1	1	50	Pre_strict	-1.05067	-0.87232	5.41478	5.33009	-0.49956	-0.82384	-0.52984	-0.61308	-0.83245	-0.86098	-0.75657	-1.32077	-0.87769	-1.13704	0.196529	-0.76657
	Gpa_Dog_0080	GPLIN_000381900	15	1	1	23	Pre_inclusive	-0.12708	-0.06864	5.83035	6.12171	-0.02343	-0.46916	-1.46777	-1.39811	-2.0132	-1.73321	-1.3157	-1.00235	-1.81872	-1.29032	0.892166	-0.11653
	Gpa_Dog_0081	GPLIN_000225100	11	1	1	77	Pre_inclusive	0.270368	-0.38856	3.20619	3.48421	0.827135	0.017978	-0.65588	-0.83633	-1.08904	-1.2663	-0.93915	-0.28831	-0.82852	-0.71436	-0.08222	-0.71722
	Gpa_Dog_0082	GPLIN_001060800	8	1	1	23	Pre_inclusive	0.10633	-0.368	4.61723	4.99837	-0.11041	-0.33023	-0.69685	-1.16153	0.16912	-0.8437	-1.51767	-1.51767	-1.51767	-1.51767	0.566219	-0.87589
	Gpa_Dog_0083	GPLIN_001095000	4	1	1	38	Pre_inclusive	0.832083	1.73388	3.54596	3.80547	-0.98545	0.151795	-0.57897	-0.26231	-0.93994	-2.57937	-0.75854	-3.50176	0.013587	-1.31737	0.521214	0.319715
	Gpa_Dog_0084	GPLIN_001140900	4	1	1	8	Pre_inclusive	2.01336	2.68757	4.6942	4.81494	-1.09172	-0.63541	-2.03843	-1.40408	-0.95745	-2.2646	-2.2646	-2.2646	-2.2646	-2.2646	2.70045	0.539565
	Gpa_Dog_0085	GPLIN_000306500	4	1	1	8	Pre_inclusive	1.33659	2.04802	4.25493	4.65012	-1.27317	1.06079	-0.88586	-0.35978	-1.25831	-3.03062	-2.20559	-3.78096	-1.14649	-3.35303	2.07766	1.8657
	Gpa_Dog_0086	GPLIN_000476700	4	1	1	8	Pre_inclusive	2.50117	3.48488	4.90164	5.22612	-1.28358	-0.86707	-1.75941	-2.01491	-1.73142	-2.65043	-2.65043	-2.65043	-1.79828	-2.65043	3.18855	0.754041
	Gpa_Dog_0087	GPLIN_001556700	3	1	1	38	Pre_inclusive	0.182585	2.76908	1.74591	2.9074	-0.89418	-0.46593	-1.14548	-0.693	-1.14548	-1.14548	-1.14548	-1.14548	-1.14548	-1.14548	1.20601	1.26049
	Gpa_Dog_0088	GPLIN_000122100	3	1	1	77	Pre_inclusive	-0.76335	-0.67033	2.76949	2.83536	1.51626	1.29095	-0.25036	0.387424	-1.2019	-0.54152	-0.69475	-0.35196	-1.2019	-0.78987	-1.2019	-1.13165
	Gpa_Dog_0089	GPLIN_000891200	3	1	1	25	Pre_inclusive	-1.40339	1.38062	4.53869	8.70912	-1.06633	-1.26906	-1.40339	-1.26881	-1.40339	-1.40339	-1.40339	-1.40339	-1.40339	-1.40339	0.954948	-0.75205
	Gpa_Dog_0090	GPLIN_000808700	3	1	1	110	Pre_inclusive	2.13178	3.37717	5.19068	5.43601	-1.10462	-0.80725	-2.22034	-2.12625	-1.58225	-3.48101	-1.49857	-3.48101	-1.29105	-3.48101	3.47777	1.45995
	Gpa_Dog_0091	GPLIN_000943100	3	1	1	25	Pre_inclusive	-0.39974	1.57797	4.52436	4.37519	-0.77518	0.723518	-0.45509	0.38856	-1.50862	-3.23396	-2.77535	-3.23396	-1.18875	-2.39958	2.63842	1.74221
	Gpa_Dog_0092	GPLIN_000942800	2	1	1	8	Pre_inclusive	2.30578	2.25335	4.79038	4.55877	-0.1764	-0.33943	-1.86894	-1.69663	-2.03403	-2.05225	-2.69801	-2.77041	-1.63604	-2.21772	2.21135	1.37021
	Gpa_Dog_0093	GPLIN_000418700	2	1	1	38	Pre_inclusive	1.8959	1.97902	2.17957	2.20517	0.197397	-0.04771	-0.36112	-0.48153	-0.66506	-1.68453	-1.36263	-1.68453	-0.79616	-1.45265	0.535491	-0.45662
	Gpa_Dog_0094	GPLIN_000516100	2	1	1	77	Pre_inclusive	-1.10523	-0.91006	2.43212	2.56839	2.44206	1.62123	-0.00843	1.00936	-1.10523	-1.10523	-1.10523	-0.36458	-1.10523	-1.10523	-1.10523	-1.0535
	Gpa_Dog_0095	GPLIN_000191900	2	1	1	8	Pre_inclusive	0.211815	2.95582	4.83705	5.62533	-1.15736	-0.98705	-2.377	-1.08509	-1.5144	-2.24673	-2.11192	-3.28225	-1.78692	-1.9563	3.37319	1.50182
	Gpa_Dog_0096	GPLIN_000095700	2	1	1	8	Pre_inclusive	1.15633	2.07673	5.24975	6.25221	-2.12056	-0.7669	-1.97397	-1.71566	-1.67853	-1.97469	-2.87493	-2.87493	-0.97798	-2.87493	3.12496	1.97311
	Gpa_Dog_0097	GPLIN_000758100	2	1	1	23	Pre_inclusive	-1.20651	0.17197	3.22478	3.67844	1.04389	-0.33326	-0.8291	-0.05358	-0.12947	-1.53873	-0.48584	-1.53873	-1.53873	-1.53873	0.735304	0.338291
	Gpa_Dog_0098	GPLIN_000793100	2	1	1	77	Pre_inclusive	-0.05856	-0.51218	2.15063	3.18181	0.19115	-0.30391	-0.51218	-0.16473	-0.51218	-0.51218	-0.51218	-0.51218	-0.51218	-0.51218	-0.51218	-0.38678
	Gpa_Dog_0099	GPLIN_000319500	2	1	1	152	Pre_inclusive	-1.83339	-0.58555	7.86706	8.60615	-1.94108	-1.35167	-2.86795	-2.82168	-2.30424	-3.96913	-2.7008	-3.96913	-1.9897	-3.96913	7.32061	6.50964
	Gpa_Dog_0100	GPLIN_000926600	2	1	1	23	Pre_inclusive	0.035868	0.071943	5.24027	6.03932	-0.79311	0.257955	-1.035	-1.08472	-1.38473	-1.38473	-1.38473	-1.21318	-0.86788	-1.38473	0.272174	-1.38473
	Gpa_Dog_0101	GPLIN_001006300	2	1	1	77	Pre_inclusive	0.979077	1.51114	2.74325	2.90091	0.982628	0.947479	0.301581	0.236237	-0.44529	-0.85034	-1.82189	-1.80121	-1.83881	-0.76921	-1.61126	-1.46429
	Gpa_Dog_0102	GPLIN_000148200	2	1	1	8	Pre_inclusive	0.888337	2.61782	4.40829	4.80835	-2.35898	-0.5826	-2.09996	-1.30227	-1.60758	-1.81459	-1.13831	-2.35898	-1.01168	-2.35898	2.38357	1.52758
	Gpa_Dog_0103	GPLIN_000293400	2	1	1	43	Pre_inclusive	-1.27892	-1.27892	1.82973	1.27291	-0.73801	-0.8486	0.368802	0.067105	-0.6279	-0.62471	-1.27892	-0.89804	-1.27892	-1.08331	4.95984	1.43787
	Gpa_Dog_0104	GPLIN_000590900	2	1	1	43	Pre_inclusive	-1.28515	-1.28515	2.02289	2.14416	-0.64922	-0.7328	0.68668	0.453378	-1.28515	-1.28515	-1.28515	-1.28515	-1.28515	-1.28515	4.46825	1.88789
	Gpa_Dog_0105	GPLIN_000407400	2	1	1	77	Pre_inclusive	0.820976	-0.05649	2.55492	2.36169	1.78213	1.67802	-0.10094	-0.78027	-1.163	-1.163	-1.163	-0.42518	-1.163	-1.163	-1.163	-0.85685
	Gpa_Dog_0106	GPLIN_000208800	3	1	1	54	Early_strict	-1.73465	-1.53059	-1.09121	-0.8231	2.51412	2.11652	1.93812	1.88962	0.135777	0.142167	-0.17913	-1.29972	-0.2488	0.087663	-0.28524	-1.63153
	Gpa_Dog_0107	GPLIN_001030900	3	1	1	54	Early_strict	-1.00868	-0.91245	-0.14426	1.18109	2.29426	2.50193	2.04596	2.12631	-0.1141	-1.14426	-0.99174	-1.5537	-1.02538	-0.64906	-1.13139	-1.47453
	Gpa_Dog_0108	GPLIN_001157600	3	1	1	54	Early_strict	-1.18928	-0.71003	-0.82022	-0.78175	2.82075	2.94454	1.86559	2.73323	1.09613	-0.82326	-1.18928	-1.18928	-1.18928	-1.18928	-1.18928	-1.18928
	Gpa_Dog_0109	GPLIN_000965500	2	1	1	62	Early_strict	-1.31832	1.35365	-1.31832	-1.31832	2.05557	3.20501	2.5413	1.67442	2.35326	-1.31832	-1.31832	-1.31832	-1.31832	-1.31832	-1.31832	-1.31832
	Gpa_Dog_0110	GPLIN_000637700	2	1	1	54	Early_strict	-1.62003	-1.40086	-0.13957	-0.58207	2.2082	1.6796	1.67975	1.11085	0.154062	1.04696	-0.46843	-0.58807	-0.70069	0.808184	-1.62003	-1.56786
	Gpa_Dog_0111	GPLIN_000185400	2	1	1	154	Early_strict	-5.76935	-5.77301	-4.70752	-4.66718	4.79696	5.69113	5.38092	5.70965	3.1699	2.58661	0.738218	-0.43382	-0.79224	-0.57086	-2.96023	-2.39917
	Gpa_Dog_0112	GPLIN_001607300	2	1	1	62	Early_strict	-3.09416	-2.43475	-1.90127	-0.23811	3.70599	5.7203	2.93929	4.23561	1.31602	-1.66185	-0.52591	-2.35351	0.077765	0.033269	-3.09416	-2.72453
	Gpa_Dog_0113	GPLIN_001166500	2	1	1	54	Early_strict	-1.29619	-1.37182	-0.98541	-1.02361	2.16422	1.92684	1.61319	0.96635	-0.02687	0.909335	-0.32159	0.177942	-0.31106	0.509586	-1.40697	-1.52394
	Gpa_Dog_0114	GPLIN_000283300	4	1	1	150	Early_inclusive	-2.46617	-2.46617	-2.46617	-2.46617	4.00148	8.57202	-0.93309	2.62516	-1.06266	-2.46617	-1.61747	-2.46617	-1.15159	-0.65311	0.012736	5.00359
	Gpa_Dog_0115	GPLIN_000384400	3	1	1	76	Early_inclusive	-0.32334	-0.07596	1.03904	0.648338	-0.42308	2.38541	3.82489	4.23166	0.288052	-2.51997	-2.8497	-3.75636	-1.36019	-3.10376	-0.23766	2.23263
	Gpa_Dog_0116	GPLIN_000258300	3	1	1	52	Early_inclusive	-1.29346	-1.52146	-1.73038	-1.75669	1.08181	2.04707	2.56766	3.15004	0.466923	-0.95552	-1.94907	-1.81772	-1.77389	-1.93904	1.73972	3.68399
	Gpa_Dog_0117	GPLIN_000866800	2	1	1	76	Early_inclusive	-0.84639	-0.79831	-1.09357	-1.54691	1.60435	2.99314	3.82681	3.59129	-0.73956	-1.35533	-1.62178	-2.34957	-0.77071	-2.48177	0.002996	1.58532
	Gpa_Dog_0118	GPLIN_001036900	2	1	1	69	Early_inclusive	-3.30788	-3.19887	-2.7013	-3.217	3.44094	5.32774	4.80348	5.60913	0.887888	-1.80152	-3.30788	-3.30788	1.13684	-3.18706	-0.448	3.27137
	Gpa_Dog_0119	GPLIN_000549100	2	1	1	155	Early_inclusive	-3.40266	-3.32963	-3.15881	-2.99351	3.44957	4.43084	5.35763	5.78566	0.301651	-1.15682	-2.5253	-1.72267	-2.50198	-2.08816	0.167026	3.38716
	Gpa_Dog_0120	GPLIN_001262300	2	1	1	37	Early_inclusive	-1.24193	-2.6891	-2.58123	-2.34493	2.16782	1.48797	2.55358	3.00696	-0.04315	0.477695	-1.79357	-0.68439	-1.19397	-0.41605	0.180449	3.11384
	Gpa_Dog_0121	GPLIN_000251900	2	1	1	76	Early_inclusive	-0.31577	-0.62994	-1.90837	-1.52747	0.07902	2.66728	2.53233	2.82978	-0.67757	-1.25833	-0.81645	-1.6882	-0.27698	-1.23317	0.113292	2.11054
	Gpa_Dog_0122	GPLIN_001263000	2	1	1	140	Early_inclusive	-2.2365	-0.82765	-2.94489	-2.38639	3.35733	3.48815	4.11065	4.76652	0.213633	-1.26988	-3.28607	-3.9155	-0.56888	-3.92033	0.972932	4.44688
	Gpa_Dog_0123	GPLIN_000909200	2	1	1	52	Early_inclusive	-2.09376	-1.75727	-1.31757	-1.50136	1.42748	1.29974	1.70748	2.40007	-1.27373	-1.37851	-1.45329	-1.8274	-0.73947	-1.11226	3.71526	3.90459
	Gpa_Dog_0124	GPLIN_000613200	4	1	1	108	Late_strict	-1.81074	-1.50677	-1.29089	-0.40393	-1.3162	-1.74364	0.143933	-0.22414	2.10533	-0.91582	2.69419	1.83791	3.27226	1.90492	-1.57423	-1.17219
	Gpa_Dog_0125	GPLIN_000559400	4	1	1	137	Late_strict	-4.6451	-2.29336	-0.99672	0.600868	-4.24674	-4.33962	-4.04459	-3.64204	2.18807	-0.45547	9.41658	5.9177	10.0342	5.79639	-4.6451	-4.6451
	Gpa_Dog_0126	GPLIN_000559500	3	1	1	137	Late_strict	-3.86917	-2.28852	-1.12292	-0.30371	-4.74394	-3.47478	-4.22153	-3.71187	2.62685	-0.01459	9.50908	5.92361	9.71843	5.68889	-4.66038	-5.05546
	Gpa_Dog_0127	GPLIN_001458400	3	1	1	3	Late_strict	-2.88653	-2.88653	-2.32552	-2.88653	-2.88653	-2.71988	-2.03209	-1.94529	2.58999	1.20172	6.44141	4.22063	7.10161	4.42323	-2.88653	-2.52318
	Gpa_Dog_0128	GPLIN_000559000	3	1	1	3	Late_strict	-3.47162	-3.47162	-3.21223	-1.1584	-3.47162	-3.47162	-3.47162	-3.31464	2.41551	0.104583	8.81362	5.91692	9.33821	5.39776	-3.47162	-3.47162
	Gpa_Dog_0129	GPLIN_001231500	3	1	1	108	Late_strict	-1.3509	-1.3509	-1.10518	-1.07839	-1.3509	-0.7808	-0.44933	-0.72841	1.57165	0.817413	2.73806	0.560079	3.86599	1.17227	-1.3509	-1.17976
	Gpa_Dog_0130	GPLIN_000528600	3	1	1	160	Late_strict	-1.81248	0.176396	-0.88652	-0.18118	-1.85373	-1.16556	-2.12893	-1.83916	-0.21566	0.005514	3.70961	1.47932	4.70006	1.55967	-1.00621	-0.54113
	Gpa_Dog_0131	GPLIN_000906700	3	1	1	137	Late_strict	-4.80635	-1.42002	-4.80635	-1.3744	-4.80635	-4.21238	-4.80635	-3.79144	3.40068	0.873137	10.8072	7.0044	10.8552	6.69577	-4.80635	-4.80635
	Gpa_Dog_0132	GPLIN_000679500	3	1	1	124	Late_strict	-3.12435	-3.12435	-2.95148	-3.02503	-2.74589	-2.68263	3.18374	1.98591	4.12159	4.72678	1.89714	3.03405	1.16284	3.61316	-2.94715	-3.12435
	Gpa_Dog_0133	GPLIN_000559100	2	1	1	3	Late_strict	-3.92137	-3.66429	-2.63262	-1.73391	-3.38194	-3.25379	-3.92137	-3.69678	2.05163	0.510742	8.87358	6.56043	9.7602	6.29224	-3.92137	-3.92137
	Gpa_Dog_0134	GPLIN_000476200	2	1	1	55	Late_strict	-2.67293	-0.92789	-3.15944	-3.24278	-3.69848	0.237773	-3.10205	-0.35911	3.7545	0.979089	6.83355	1.74984	5.86378	2.27042	-3.04881	-1.47746
	Gpa_Dog_0135	GPLIN_001541700	2	1	1	3	Late_strict	-2.86475	-1.67704	-2.55865	-2.86475	-2.86475	-2.86475	-2.60061	-2.62211	-0.30711	-1.9112	8.22041	5.88006	8.41904	5.19958	-1.71859	-2.86475
	Gpa_Dog_0136	GPLIN_001293600	2	1	1	4	Late_strict	-1.89248	-1.99592	-1.95469	-1.69948	-1.48355	-1.65837	-0.28742	-0.95492	0.737536	1.92561	2.76621	3.51985	2.80407	3.15616	-1.52322	-1.45939
	Gpa_Dog_0137	GPLIN_000528500	2	1	1	87	Late_strict	-1.26656	-1.17306	-0.82902	-1.72656	-2.0778	-2.11254	-1.4043	-2.26829	-1.4268	0.274212	3.10187	3.75708	3.98842	3.71949	-0.38257	-0.17359
	Gpa_Dog_0138	GPLIN_001630300	2	1	1	3	Late_strict	-1.29652	-2.85951	-2.85951	-2.52238	-2.85951	-2.55275	-2.85951	-2.85951	2.87069	1.92449	6.61381	4.12307	6.67273	3.68435	-2.54761	-2.67232
	Gpa_Dog_0139	GPLIN_000987000	2	1	1	45	Late_strict	-4.9003	-4.80227	-3.78941	-3.93816	-2.65662	-2.86574	-1.0723	-3.01523	3.48063	4.44974	5.3118	6.38251	6.83448	6.03741	-1.63126	-3.82528
	Gpa_Dog_0140	GPLIN_001396400	2	1	1	3	Late_strict	-3.102	-1.72494	-3.102	-1.42145	-3.102	-3.102	-3.102	-2.67455	2.06433	-1.05862	6.88663	6.02459	7.91704	5.70097	-3.102	-3.102
	Gpa_Dog_0141	GPLIN_000767700	2	1	1	108	Late_strict	-1.96901	-1.88649	-1.79184	-1.96901	-1.15953	-1.21922	-1.13919	-1.35441	-0.29676	-0.23352	1.14193	2.13722	2.7055	1.39605	3.34764	2.29067
	Gpa_Dog_0142	GPLIN_000963000	2	1	1	3	Late_strict	-2.91641	-2.63862	-1.98429	-0.07959	-4.68521	-3.0823	-4.10766	-3.89517	3.19366	0.775276	6.83701	4.02511	8.16049	3.64009	-2.08737	-1.15502
	Gpa_Dog_0143	GPLIN_001541600	2	1	1	3	Late_strict	-3.65196	-1.48954	-3.65196	-1.69585	-3.65196	-3.65196	-3.65196	-1.61207	1.6331	0.373879	9.36688	4.62867	9.62789	4.73074	-3.65196	-3.65196
	Gpa_Dog_0144	GPLIN_000702400	2	1	1	45	Late_strict	-4.46294	-4.34186	-4.25333	-4.11353	-3.25337	-3.12491	-2.62256	-3.17914	2.7833	4.00687	6.77149	7.83703	8.14994	7.55926	-3.99724	-3.75903
	Gpa_Dog_0145	GPLIN_000945900	2	1	1	45	Late_strict	-5.06115	-5.49146	-5.27913	-5.5671	-4.45351	-3.75697	-1.4781	-3.90839	4.99438	5.94775	8.43553	8.2211	9.09709	8.51156	-5.22275	-4.98885
	Gpa_Dog_0146	GPLIN_000874400	2	1	1	162	Late_strict	-2.85522	-2.21101	-2.85522	-1.45902	-2.44695	-2.5419	-2.41799	-1.59369	5.23684	3.47053	5.61589	3.22115	3.96176	1.20325	-1.66456	-2.66386
	Gpa_Dog_0147	GPLIN_000983500	2	1	1	87	Late_strict	-1.55443	-1.2652	0.53414	0.428151	-0.86368	-1.18676	-1.92207	-1.73064	0.194106	1.58736	2.02404	2.64778	2.31803	2.87702	-2.10162	-1.98623
	Gpa_Dog_0148	GPLIN_000768400	4	1	1	42	All_infection_strict	-3.16197	-2.56579	-2.57241	-2.80289	3.81972	2.57704	1.13169	1.65351	1.00486	1.43815	0.431123	1.77002	0.710513	1.21919	-2.38584	-2.26695
	Gpa_Dog_0149	GPLIN_001080600	4	1	1	56	All_infection_strict	-1.36278	-1.1765	-1.27825	-1.71654	2.6819	2.57705	1.96983	1.84476	0.939384	0.101455	-0.40854	-0.41055	-0.26785	-0.11687	-1.59832	-1.77817
	Gpa_Dog_0150	GPLIN_001304100	4	1	1	7	All_infection_strict	-2.25529	-2.11336	-0.75281	-0.98786	1.12437	1.16252	0.818787	1.12689	-0.28858	-0.08221	0.05596	0.442855	0.787655	0.188603	-0.50432	1.27679
	Gpa_Dog_0151	GPLIN_001043600	3	1	1	56	All_infection_strict	-0.80408	-0.82892	-1.64942	-1.01026	2.48034	3.30602	-0.73233	2.67635	0.633883	-2.02083	0.867393	0.436517	1.60705	-1.00318	-2.00584	-1.95269
	Gpa_Dog_0152	GPLIN_000950100	3	1	1	42	All_infection_strict	-3.82575	-4.63442	-3.13749	-4.13829	3.5223	3.57029	2.84591	2.18235	1.44263	1.40463	1.06359	1.27505	1.83618	1.17406	-1.56145	-3.01958
	Gpa_Dog_0153	GPLIN_000912100	3	1	1	56	All_infection_strict	-1.09957	-1.8416	-2.1432	-1.59312	3.05103	3.40155	2.1731	1.60718	0.977632	0.538899	-0.147	0.097615	0.296045	0.266163	-2.41637	-3.16836
	Gpa_Dog_0154	GPLIN_000642100	3	1	1	56	All_infection_strict	-1.94127	-1.94127	-1.34104	-1.57517	2.32448	3.26771	0.266108	2.04674	1.86143	-1.1202	1.06723	-1.94127	1.68697	-1.68542	-0.30033	-0.67472
	Gpa_Dog_0155	GPLIN_000684200	3	1	1	17	All_infection_strict	-2.10618	-2.10618	-1.59401	-1.63966	1.94102	1.05275	1.19243	0.853075	0.48736	1.20865	0.455035	1.10652	0.177448	1.0557	-0.24815	-1.83579
	Gpa_Dog_0156	GPLIN_000683800	3	1	1	17	All_infection_strict	-1.9395	-1.9395	-1.62575	-1.9395	2.21356	1.43497	0.731577	0.959702	1.21327	1.96338	-1.1752	1.4003	0.964755	0.489528	-0.94127	-1.81032
	Gpa_Dog_0157	GPLIN_001102300	2	1	1	56	All_infection_strict	-2.00668	-0.62184	-2.42625	-1.86526	0.373284	0.925357	0.439265	0.856344	1.61921	0.576408	1.77765	0.284547	1.14318	0.333361	-1.68235	0.273784
	Gpa_Dog_0158	GPLIN_001455000	2	1	1	42	All_infection_strict	-3.25849	-3.16377	-2.824	-1.68925	2.71667	2.26968	1.81207	2.02506	-1.27081	-1.30071	0.176672	1.93188	1.3055	1.98103	0.498939	-1.21045
	Gpa_Dog_0159	GPLIN_000167300	2	1	1	17	All_infection_strict	-2.04022	-1.62726	-2.04022	-1.91389	3.24057	3.33369	2.50646	2.7061	-0.17004	1.26819	-0.91913	-0.31668	-0.47264	0.262674	-1.92398	-1.89363
	Gpa_Dog_0160	GPLIN_000932700	2	1	1	42	All_infection_strict	-3.56584	-1.68825	-1.63831	-1.53968	2.81182	2.98033	2.23409	1.65304	1.98125	0.92074	0.471282	-0.23288	1.05763	0.231651	-2.21986	-3.45701
	Gpa_Dog_0161	GPLIN_000638800	2	1	1	42	All_infection_strict	-3.85465	-3.85465	-2.56684	-1.30808	3.21389	3.57109	2.50072	1.77655	1.41644	0.43558	0.718157	-0.23636	0.773868	-1.76622	1.56095	-2.38044
	Gpa_Dog_0162	GPLIN_001090500	2	1	1	56	All_infection_strict	-1.13354	-2.34744	-1.34578	-0.37616	3.53859	3.993	0.109195	0.309294	0.542696	-0.90311	-0.23466	0.168929	0.918618	-0.17609	-1.04992	-2.01364
	Gpa_Dog_0163	GPLIN_000991200	2	1	1	11	All_infection_strict	-2.99067	-3.31727	-3.46349	-3.66005	-0.54291	-0.76264	1.70728	1.44968	1.30058	1.6764	0.898108	1.68271	1.55968	2.0675	0.805761	1.58934
	Gpa_Dog_0164	GPLIN_001231400	2	1	1	32	All_infection_strict	-1.80511	-1.80511	-0.05116	-0.36789	-1.18925	-1.0057	0.040188	-0.81298	0.720003	1.45236	1.80478	2.145	2.46748	1.4682	-1.68477	-1.37605
	Gpa_Dog_0165	GPLIN_001463000	2	1	1	17	All_infection_strict	-2.2634	-2.2634	-1.97151	-1.26027	2.86194	2.40475	1.68957	1.49127	0.353331	0.975639	-0.55993	0.861061	-0.85931	0.488193	-0.26606	-1.68187
	Gpa_Dog_0166	GPLIN_000763000	2	1	1	17	All_infection_strict	-1.96503	-1.87316	-1.44414	-1.36299	2.78173	2.43495	1.25772	0.803266	0.261885	1.08801	-0.87961	0.754422	-0.59032	1.34691	-0.90627	-1.70738
	Gpa_Dog_0167	GPLIN_000203300	2	1	1	42	All_infection_strict	-3.23861	-3.23861	-3.23861	-3.09679	3.45828	3.77147	2.54765	2.1298	1.49559	1.19797	0.795747	0.668715	1.78501	0.880369	-2.67935	-3.23861
	Gpa_Dog_0168	GPLIN_001255700	2	1	1	42	All_infection_strict	-3.22686	-3.08162	-3.01681	-2.9936	3.05738	2.87152	2.70589	1.54294	1.43453	2.22263	0.492119	2.11703	0.904858	1.35024	-3.22686	-3.15338
	Gpa_Dog_0169	GPLIN_001068600	2	1	1	67	All_infection_strict	-4.99945	-5.36442	-2.08918	-2.64028	2.92386	2.61755	2.82558	1.53056	1.75463	3.24779	0.201137	1.83968	0.012277	1.32164	-0.91971	-2.26168
	Gpa_Dog_0170	GPLIN_000668700	2	1	1	42	All_infection_strict	-3.18399	-2.49124	-2.59869	-2.71404	3.05206	3.46379	2.52013	1.61404	0.93909	0.401985	0.526322	0.027995	0.421643	-0.61924	1.44715	-2.80699
	Gpa_Dog_0171	GPLIN_001221800	2	1	1	42	All_infection_strict	-2.92963	-2.59578	-2.67548	-2.20972	3.03797	3.59902	2.79577	2.50312	1.37618	1.22364	-0.04797	0.441334	0.991063	0.187922	-2.92963	-2.76784
	Gpa_Dog_0172	GPLIN_000907700	2	1	1	81	All_infection_strict	-6.01943	-6.91671	-6.91671	-6.91671	3.30564	-0.21037	1.84071	1.38778	4.48361	5.55402	6.10733	5.62466	3.68709	5.35217	-5.15277	-5.21032
	Gpa_Dog_0173	GPLIN_000240700	2	1	1	42	All_infection_strict	-2.36131	-2.62978	-2.91366	-3.0151	4.21331	2.98397	2.92851	1.74344	0.905289	1.67334	-0.98946	1.02481	-0.04132	1.07991	-1.75824	-2.84371
	Gpa_Dog_0174	GPLIN_000119200	2	1	1	56	All_infection_strict	-0.82303	-1.29865	-1.02278	-1.55155	2.7946	3.12436	1.13303	1.72161	1.7535	-0.70512	0.371425	-0.75553	1.01822	-1.02804	-2.14893	-2.58313
	Gpa_Dog_0175	GPLIN_000371200	2	1	1	96	All_infection_strict	-2.29576	-2.29576	-2.29576	-2.29576	3.78278	3.73751	1.83518	2.2133	-0.0397	0.850437	-0.88735	1.40535	-0.68775	1.18888	-2.20405	-2.01155
	Gpa_Dog_0176	GPLIN_000208100	2	1	1	42	All_infection_strict	-1.8535	-1.8535	-1.8535	-1.8535	1.99373	3.4715	2.56188	3.11248	1.39897	0.32977	-0.72507	-0.52787	-0.54981	-0.68928	-1.663	-1.29931
	Gpa_Dog_0177	GPLIN_000695000	2	1	1	42	All_infection_strict	-3.25995	-3.27099	-2.97169	-2.50164	3.96663	3.25239	2.56542	2.01011	1.06245	1.675	-0.20267	0.952158	-0.03568	0.820447	-1.47576	-2.58621
	Gpa_Dog_0178	GPLIN_000235400	2	1	1	135	All_infection_strict	-3.13269	-2.62971	0.322029	0.733693	3.37742	3.61179	1.24643	2.3891	1.59712	-0.49779	0.272232	0.383625	0.75503	-0.3937	-4.22654	-3.80805
	Gpa_Dog_0179	GPLIN_000167200	2	1	1	42	All_infection_strict	-3.15664	-2.91782	-2.59567	-3.10252	4.01189	3.30496	2.58586	2.20546	1.25659	1.68662	-0.17652	0.581173	0.47736	1.04367	-2.72193	-2.48248
	Gpa_Dog_0180	GPLIN_001166600	2	1	1	96	All_infection_strict	-3.0604	-2.62641	-1.26679	-1.22909	3.37686	3.22208	2.54868	1.92334	0.983473	1.01393	-0.47481	-0.13756	-0.01081	0.936038	-2.37056	-2.82798
	Gpa_Dog_0181	GPLIN_001391000	2	1	1	42	All_infection_strict	-1.07647	-2.09903	-2.19019	-1.77468	2.07077	2.69203	2.03263	1.07896	1.3673	1.69547	-0.7672	1.22734	-0.05093	0.53332	-2.25311	-2.4862
	Gpa_Dog_0182	GPLIN_000929300	2	1	1	11	All_infection_strict	-4.45372	-4.29553	-3.43303	-3.71212	-0.22789	-0.07858	2.17019	0.949093	3.18791	3.28393	2.05585	2.3446	2.19195	1.93746	-0.60343	-1.31669
	Gpa_Dog_0183	GPLIN_000440000	2	1	1	17	All_infection_strict	-3.60693	-4.06935	1.15882	1.03282	1.3753	1.12645	1.39301	1.23951	1.00164	1.48423	-0.4752	0.846556	-0.57323	0.83533	-0.67145	-2.09752
	Gpa_Dog_0184	GPLIN_001158900	2	1	1	56	All_infection_strict	-2.12063	-1.63025	-1.53646	-1.38016	3.13365	1.69637	0.269817	0.99028	2.78148	-0.99179	1.34503	-0.13199	1.74673	-0.79765	-1.42916	-1.94529
	Gpa_Dog_0185	GPLIN_000769000	2	1	1	42	All_infection_strict	-2.16054	-1.78661	-2.36389	-2.34921	2.99068	4.17977	2.74957	3.4555	2.41317	0.046587	0.686774	-0.75306	-1.49428	-1.84916	-1.67117	-2.09415
	Gpa_Dog_0186	GPLIN_000812300	2	1	1	42	All_infection_strict	-2.34448	-2.90962	-2.99078	-3.18789	3.59128	3.29847	2.77354	2.18141	1.23601	1.36418	-0.53854	1.08866	-0.11536	0.943936	-1.734	-2.65682
	Gpa_Dog_0187	GPLIN_000208700	2	1	1	42	All_infection_strict	-1.80888	-1.60926	-1.77125	-2.11463	2.48161	2.20288	2.31114	1.48399	1.72829	0.707007	-0.06931	0.294999	0.599921	-0.43436	-2.13396	-1.8682
	Gpa_Dog_0188	GPLIN_000758500	2	1	1	96	All_infection_strict	-3.44443	-3.29052	0.203552	0.492504	4.269	3.08881	1.24574	1.85606	-0.12535	1.76729	-1.36266	1.71762	-1.40409	1.29016	-3.115	-3.18867
	Gpa_Dog_0189	GPLIN_000832500	3	1	1	60	All_infection_strict	-0.84211	-1.16606	1.49725	1.81636	3.23766	1.4395	0.557849	0.960299	0.188592	0.919966	-0.62312	-0.51961	-1.65003	-0.31429	-2.84535	-2.65691
